# Supplementary material for: Uev1A counteracts oncogenic Ras stimuli in both polyploid and diploid cells
Source: eLife. 2026 Mar 25;14:RP107104. doi: 10.7554/eLife.107104 (PMC13016607; doi:10.7554/eLife.107104)
Supplement: Source data 1. [file elife-107104-data1.xlsx]

## Sheet: Screening results
Deficiency number	degrading egg chambers/ovary
7584	7.8
7617	5.8
7588	5.3
7564	5.2
7569	5
7625	4.7
7576	4.7
7660	4
7640	4
7575	3.8
7580	3.8
7741	3.5
7568	3.3
7655	3.2
7891	3.16667
7558	3
7526	2.8
7600	2.8
7610	2.8
7659	2.8
7572	2.8
7664	2.7
7666	2.7
7730	2.66667
7901	2.66667
7732	2.5
7679	2.5
7680	2.5
7570	2.5
7628	2.5
7574	2.5
7581	2.5
7862	2.5
7916	2.5
7937	2.5
7940	2.5
7683	2.4
7670	2.33333
7902	2.33333
7961	2.33333
7602	2.3
7565	2.3
7567	2.3
7651	2.3
7652	2.3
7653	2.3
7608	2.2
7717	2.2
7720	2.2
7662	2.16667
7726	2.16667
7875	2.16667
7903	2.16667
7566	2.1
7528	2
7677	2
7638	2
7644	2
7719	2
7637	2
7641	2
7694	2
7795	2
7818	2
7872	2
7876	2
7880	2
7908	2
7921	2
7923	2
7928	2
7956	2
7837	1.83333
7864	1.8
7900	1.83333
7920	1.83333
7960	1.83333
7963	1.83333
7975	1.83333
7981	1.83333
7995	1.83333
7601	1.8
7616	1.8
7627	1.8
7577	1.8
7645	1.8
7718	1.8
7721	1.8
7649	1.8
7594	1.7
7620	1.7
7632	1.7
7493	1.7
7525	1.7
7607	1.7
7689	1.66667
7737	1.66667
7763	1.66667
7767	1.66667
7803	1.66667
7893	1.66667
7894	1.66667
7906	1.66667
7926	1.66667
7929	1.66667
7947	1.66667
7972	1.66667
7578	1.6
7596	1.5
7609	1.5
7671	1.5
7675	1.5
7626	1.5
7699	1.5
7711	1.5
7722	1.5
7802	1.5
7813	1.5
7816	1.5
7886	1.5
7946	1.5
7948	1.5
7949	1.5
7951	1.5
7955	1.5
7994	1.5
7643	1.4
7589	1.33333
7642	1.33333
7736	1.33333
7742	1.33333
7748	1.33333
7766	1.33333
7822	1.33333
7840	1.33333
7867	1.33333
7869	1.33333
7882	1.33333
7883	1.33333
7898	1.33333
7925	1.33333
7932	1.33333
7945	1.33333
7958	1.33333
7970	1.33333
7980	1.33333
7997	1.33333
7999	1.33333
7533	1.3
7661	1.3
7537	1.3
7557	1.3
7690	1.3
7693	1.3
7700	1.3
7715	1.3
7740	1.3
7639	1.3
7534	1.2
7672	1.2
7630	1.2
7648	1.2
7586	1.16667
7686	1.16667
7746	1.16667
7764	1.16667
7810	1.16667
7815	1.16667
7820	1.16667
7846	1.16667
7860	1.16667
7913	1.16667
7919	1.16667
7944	1.16667
7964	1.16667
7982	1.16667
7988	1.2
7991	1.16667
7614	1.1
7516	1
7523	1
7532	1
7604	1
7665	1
7669	1
7674	1
7676	1
7681	1
7538	1
7540	1
7552	1
7621	1
7622	1
7623	1
7687	1
7703	1
7491	1
7494	1
7647	1
7559	1
7731	1
7743	1
7752	1
7762	1
7765	1
7804	1
7814	1
7850	1
7877	1
7890	1
7933	1
7935	1
7515	1
7615	1
7636	0.833333
7678	0.833333
7691	0.833333
7744	0.833333
7779	0.833333
7782	0.833333
7787	0.833333
7793	0.833333
7794	0.833333
7796	0.833333
7798	0.833333
7799	0.833333
7830	0.833333
7833	0.833333
7847	0.833333
7858	0.833333
7863	0.833333
7895	0.833333
7931	0.833333
7934	0.833333
7938	0.833333
7943	0.833333
7950	0.833333
7957	0.833333
7966	0.833333
7967	0.833333
7968	0.833333
7976	0.833333
7983	0.833333
7989	0.833333
7992	0.833333
7993	0.833333
7909	0.833333
7501	0.8
7527	0.8
7587	0.8
7593	0.8
7612	0.8
7667	0.8
7549	0.8
7562	0.8
7685	0.8
7713	0.8
7714	0.8
7597	0.7
7582	0.7
7503	0.7
7506	0.7
7510	0.7
7530	0.7
7668	0.7
7544	0.7
7716	0.7
7646	0.7
7489	0.7
7573	0.666667
7704	0.666667
7780	0.666667
7811	0.666667
7828	0.666667
7849	0.666667
7859	0.666667
7870	0.666667
7873	0.666667
7930	0.666667
7953	0.666667
7954	0.666667
7969	0.666667
7985	0.666667
7599	0.6
7658	0.6
7619	0.6
7502	0.5
7513	0.5
7514	0.5
7606	0.5
7673	0.5
7545	0.5
7548	0.5
7561	0.5
7613	0.5
7684	0.5
7692	0.5
7571	0.5
7583	0.5
7495	0.5
7497	0.5
7633	0.5
7729	0.5
7734	0.5
7772	0.5
7774	0.5
7776	0.5
7778	0.5
7786	0.5
7792	0.5
7831	0.5
7841	0.5
7887	0.5
7922	0.5
7936	0.5
7987	0.5
7695	0.4
7498	0.333333
7519	0.333333
7745	0.333333
7775	0.333333
7784	0.333333
7797	0.333333
7807	0.333333
7809	0.333333
7843	0.333333
7871	0.333333
7879	0.333333
7962	0.333333
7977	0.333333
7990	0.333333
7507	0.3
7508	0.3
7535	0.3
7605	0.3
7682	0.3
7539	0.3
7629	0.3
7688	0.3
7492	0.3
7500	0.3
7585	0.3
7595	0.2
7598	0.2
7490	0.2
7517	0.166667
7785	0.166667
7927	0.166667
7941	0.166667
7942	0.166667
7531	0
7591	0
7546	0
7624	0
7631	0
7634	0
7635	0
7696	0
7707	0
7708	0
7709	0
