# Supplementary material for: Uev1A counteracts oncogenic Ras stimuli in both polyploid and diploid cells
Source: eLife. 2026 Mar 25;14:RP107104. doi: 10.7554/eLife.107104 (PMC13016607; doi:10.7554/eLife.107104)
Supplement: Source data 2. [file elife-107104-data2.xlsx]

## Sheet: All genotypes
Figures	Figure Number	Genotype
Figure 1	Figure 1B	bam>3flag-RasG12V	bam-GAL4-VP16/+; UASz-3flag-RasG12V/+
	Figures 1D, E	bam>RasG12V	bam-GAL4-VP16/+;; UASp-RasG12V/+
		Df#7584/+	Df#7584/+
		bam>RasG12V; Df#7584/+	bam-GAL4-VP16/+;; UASp-RasG12V/Df#7584
		bam>RasG12V+GFP-i	bam-GAL4-VP16/+; UASp-GFP-RNAi/+; UASp-RasG12V/+
		bam>RasG12V+uev1a-i	bam-GAL4-VP16/+; UASp-uev1a-RNAi/+; UASp-RasG12V/+
		bam>RasG12V+GFP; Df#7584/+	bam-GAL4-VP16/+; UASp-GFP/+; UASp-RasG12V/Df#7584
		bam>RasG12V+Uev1A; Df#7584/+	bam-GAL4-VP16/+; UASz-Uev1A/+; UASp-RasG12V/Df#7584
Figure 2	Figures 2A, D	nos>GFP	w; UASp-GFP/+; nos-GAL4-VP16/+
		nos>RasG12V	w;; UASp-RasG12V/nos-GAL4-VP16
		nos>RasG12V+GFP-i	w; UASp-GFP-RNAi/+; UASp-RasG12V/nos-GAL4-VP16
		nos>RasG12V+uev1a-i	w; UASp-uev1a-RNAi/+; UASp-RasG12V/nos-GAL4-VP16
	Figures 2C, D	nos>RasG12V; uev1aΔ1/+	w; UASp-RasG12V/+; nos-GAL4-VP16/uev1aΔ1
		nos>RasG12V; uev1aΔ2/+	w; UASp-RasG12V/+; nos-GAL4-VP16/uev1aΔ2
	Figures 2F, G	nos>RasG12V+lacZ	w; UASz-lacZ/+; UASp-RasG12V/nos-GAL4-VP16
		nos>RasG12V+Uev1A	w; UASz-Uev1A/+; UASp-RasG12V/nos-GAL4-VP16
		nos>RasG12V+UBE2V1	w; UASz-UBE2V1/+; UASp-RasG12V/nos-GAL4-VP16
		nos>RasG12V+UBE2V2	w; UASz-UBE2V2/+; UASp-RasG12V/nos-GAL4-VP16
Figure 2-figure supplement 1	Figure 2-figure supplement 1A, B	nos>GFP	w; UASp-GFP/+; nos-GAL4-VP16/+
		nos>Yki3SA	w; UASz-yki3SA/+; nos-GAL4-VP16/+
		nos>Yki3SA+GFP	w; UASz-yki3SA/UASp-GFP; nos-GAL4-VP16/+
		nos>Yki3SA+Uev1A	w; UASz-yki3SA/UASz-Uev1A; nos-GAL4-VP16/+
Figure 3	Figure 3A, B	nos>RasG12V+GFP-i (1)	w; UASp-GFP-RNAi/+; UASp-RasG12V/nos-GAL4-VP16
		nos>RasG12V+GFP-i (2)	w; UASp-RasG12V/+; UASp-GFP-RNAi/nos-GAL4-VP16
		nos>RasG12V+tefu-i	w; UASp-tefu-RNAi/+; UASp-RasG12V/nos-GAL4-VP16
		nos>RasG12V+lok-i	w; UASp-lok-RNAi/+; UASp-RasG12V/nos-GAL4-VP16
		nos>RasG12V+p53-i	w; UASp-RasG12V/+; UASp-p53-RNAi/nos-GAL4-VP16
	Figure 3C	nos>GFP	w; UASp-GFP/+; nos-GAL4-VP16/+
		nos>RasG12V	w;; UASp-RasG12V/nos-GAL4-VP16
	Figure 3E	uev1a-flag/+	w;; uev1a-flag/+
		nos>RasG12V; uev1a-flag/+	w; UASp-RasG12V/+; uev1a-flag/nos-GAL4-VP16
Figure 3-figure supplement 1	Figure 3-figure supplement 1A, B	nos>GFP-i	w; UASp-GFP-RNAi/+; nos-GAL4-VP16/+
		nos>BicD-i	w; UASp-BicD-RNAi/+; nos-GAL4-VP16/+
		nos>BicD-i+GFP	w; UASp-BicD-RNAi/UASp-GFP; nos-GAL4-VP16/+
		nos>BicD-i+RasG12V	w; UASp-BicD-RNAi/+; UASp-RasG12V/nos-GAL4-VP16
Figure 3-figure supplement 2		uev1a-flag/+	w;; uev1a-flag/+
Figure 3-figure supplement 3		bam>3flag-RasG12V+GFP	bam-GAL4-VP16/+; UASz-3flag-RasG12V/UASp-GFP
		bam>3flag-RasG12V+Uev1A	bam-GAL4-VP16/+; UASz-3flag-RasG12V/UASz-Uev1A
Figure 4	Figures 4A, B	nos>RasG12V+GFP-i	w; UASp-RasG12V/+; nos-GAL4-VP16/UASp-GFP-RNAi
		nos>RasG12V+dsor1-i	w; UASp-RasG12V/+; nos-GAL4-VP16/UASp-dsor1-RNAi
		nos>RasG12V+rl-i	w; UASp-RasG12V/+; nos-GAL4-VP16/UASp-rl-RNAi
	Figures 4C, D	nos>CycA	w; UASp-CycA/+; nos-GAL4-VP16/+
		nos>CycA+Uev1A	w; UASp-CycA/UASz-Uev1A; nos-GAL4-VP16/+
		nos>CycB	w; UASp-CycB/+; nos-GAL4-VP16/+
		nos>Cdk1	w; UASp-Cdk1/+; nos-GAL4-VP16/+
		nos>Stg	w; UASp-Stg/+; nos-GAL4-VP16/+
	Figure 4E	w1118	w1118
		nos>GFP	w; UASp-GFP/+; nos-GAL4-VP16/+
		nos>RasG12V	w;; UASp-RasG12V/nos-GAL4-VP16
	Figure 4F, G	nos>RasG12V+GFP-i	w; UASp-GFP-RNAi/+; UASp-RasG12V/nos-GAL4-VP16
		nos>RasG12V+uev1a-i	w; UASp-uev1a-RNAi/+; UASp-RasG12V/nos-GAL4-VP16
Figure 5	Figures 5A, B	bam>RasG12V+cdc27-i	bam-GAL4-VP16/+; UASp-cdc27-RNAi/+; UASp-RasG12V/+
		bam>RasG12V+cdc27-i; uev1aΔ1/+	bam-GAL4-VP16/+; UASp-cdc27-RNAi/+; UASp-RasG12V/uev1aΔ1
		bam>RasG12V+cdc27-i; uev1aΔ2/+	bam-GAL4-VP16/+; UASp-cdc27-RNAi/+; UASp-RasG12V/uev1aΔ2
		bam>RasG12V+uev1a-i+GFP-i	bam-GAL4-VP16/+; UASp-uev1a-RNAi/UASp-GFP-RNAi; UASp-RasG12V/+
		bam>RasG12V+uev1a-i+cdc27-i	bam-GAL4-VP16/+; UASp-uev1a-RNAi/UASp-cdc27-RNAi; UASp-RasG12V/+
		bam>RasG12V+uev1a-i+fzr-i	bam-GAL4-VP16/+; UASp-uev1a-RNAi/UASp-fzr-RNAi; UASp-RasG12V/+
	Figures 5C, D	nos>RasG12V+GFP-i	w; UASp-GFP-RNAi/+; UASp-RasG12V/nos-GAL4-VP16
		nos>RasG12V+shtd-i	w; UASp-shtd-RNAi/+; UASp-RasG12V/nos-GAL4-VP16
		nos>RasG12V+mr-i	w; UASp-mr-RNAi/+; UASp-RasG12V/nos-GAL4-VP16
		nos>RasG12V+lmgA-i	w; UASp-lmgA-RNAi/+; UASp-RasG12V/nos-GAL4-VP16
Figure 5-figure supplement 1		uev1a-flag/+	w;; uev1a-flag/+
Figure 5-figure supplement 2	Figure 5-figure supplement 2A, B	bam>fzr-i	bam-GAL4-VP16/+; UASp-fzr-RNAi/+
		bam>cdc27-i	bam-GAL4-VP16/+; UASp-cdc27-RNAi/+
		bam>cdc27-i+uev1a-i	bam-GAL4-VP16/+; UASp-cdc27-RNAi/uev1a-RNAi
		bam>cdc27-i+ben-i	bam-GAL4-VP16/+; UASp-cdc27-RNAi/ben-RNAi
		bam>cdc27-i+ben-i; uev1aΔ1/+	bam-GAL4-VP16/+; UASp-cdc27-RNAi/ben-RNAi; uev1aΔ1/+
		bam>cdc27-i+ben-i; uev1aΔ2/+	bam-GAL4-VP16/+; UASp-cdc27-RNAi/ben-RNAi; uev1aΔ2/+
Figure 7	Figures 7A, B	nos>RasG12V+bam-i+GFP-i	w; UASp-GFP-RNAi/+; UASp-RasG12V UAS-bam-RNAi/nos-GAL4-VP16
		nos>RasG12V+bam-i+uev1a-i	w; UASp-uev1a-RNAi/+; UASp-RasG12V UAS-bam-RNAi/nos-GAL4-VP16
		nos>RasG12V+bam-i+GFP	w; UASp-GFP/+; UASp-RasG12V UAS-bam-RNAi/nos-GAL4-VP16
		nos>RasG12V+bam-i+Uev1A	w; UASz-Uev1A/+; UASp-RasG12V UAS-bam-RNAi/nos-GAL4-VP16
	Figures 7C-E	nos>lacZ	w; UASz-lacZ/+; nos-GAL4-VP16/+
		nos>Uev1A	w; UASz-Uev1A/+; nos-GAL4-VP16/+
