# Supplementary material for: Uev1A counteracts oncogenic Ras stimuli in both polyploid and diploid cells
Source: eLife. 2026 Mar 25;14:RP107104. doi: 10.7554/eLife.107104 (PMC13016607; doi:10.7554/eLife.107104)
Supplement: Source data 3. [file elife-107104-data3.xlsx]

## Sheet: Raw quantification data
Figure 1								Figure 2												Figure 2-figure supplement 1					Figure 3					Figure 3-figure supplement 1			Figure 4													Figure 5
Figure 1E								Figure 2D							Figure 2G					Figure 2-figure supplement 1B					Figure 3B					Figure 3-figure supplement 1B			Figure 4B				Figure 4D						Figure 4G			Figure 5B
	bam>RasG12V	Df#7584/+	bam>RasG12V; Df#7584/+	bam>RasG12V +GFP-i	bam>RasG12V +uev1a-i	bam>RasG12V+GFP; Df#7584/+	bam>RasG12V+Uev1A; Df#7584/+		nos>GFP	nos>RasG12V	nos>RasG12V +GFP-i	nos>RasG12V +uev1a-i	nos>RasG12V; uev1aΔ1/+	nos>RasG12V; uev1aΔ2/+		nos>RasG12V +lacZ	nos>RasG12V +Uev1A	nos>RasG12V +UBE2V1	nos>RasG12V +UBE2V2		nos>GFP	nos>Yki3SA	nos>Yki3SA +GFP	nos>Yki3SA +Uev1A		nos>RasG12V +GFP-i	nos>RasG12V +tefu-i	nos>RasG12V +lok-i	nos>RasG12V +p53-i		nos>BicD-i +GFP	nos>BicD-i +RasG12V		nos>RasG12V +GFP-i	nos>RasG12V +dsor1-i	nos>RasG12V +rl-i		nos>CycA	nos>CycB	nos>Cdk1	nos>Stg	nos>CycA +Uev1A		nos>RasG12V +GFP-i	nos>RasG12V +uev1a-i		bam>RasG12V+cdc27-i	bam>RasG12V+ cdc27-i; uev1aΔ1/+	bam>RasG12V+cdc27-i; uev1aΔ2/+
degrading/total egg chambers (%)	0	0.0212766	0.0434783	0	0	0	0	degrading/total egg chambers (%)	0	0.815789	0.427273	1	0.977273	0.882353	degrading/total egg chambers (%)	0.77551	0.37	0.204082	0.529412	degrading/total egg chambers (%)	0.0204082	0.0416667	0.04	0	degrading/total egg chambers (%)	0.427273	1	0.922222	0.0610687	degrading/ total egg chambers (%)	0.0434783	0.0945946	degrading/total egg chambers (%)	0.427273	0.0263158	0.1625	degrading/total egg chambers (%)	0.506849	0	0	0	0.0298507	relative CycA expression	1.9386	3.50379	degrading/total egg chambers (%)	0.193277	0.521127	0.902439
	0.0465116	0	0.1	0.0131579	0.016129	0.0192308	0.0147059		0.012987	0.963415	0.431818	0.803922	0.935484	0.973684		0.657407	0.247619	0.878049	0.511111		0	0.105263	0	0.0416667		0.431818	0.897959	0.929204	0.231481		0.0510204	0.220472		0.431818	0.0192308	0.120482		0.490566	0.038961	0	0.0222222	0.0361446		1.76781	3.48631		0.157303	0.552239	0.883333
	0.0227273	0	0.115385	0.0121951	0.0246914	0.04	0		0	0.769231	0.52459	0.974576	0.911392	0.895833		0.842857	0.118182	0.554455	0.447761		0.0392157	0.104167	0.0634921	0.0833333		0.52459	1	1	0.167785		0.0900901	0.266055		0.52459	0.0172414	0.235955		0.527027	0	0	0	0.0869565		1.71604	3.22085		0.25	0.93617	0.869565
	0	0.0394737	0	0.0243902	0.0246914	0	0.016129		0	0.772727	0.352941	0.902174	0.892857	0.928571		0.87037	0.37931	0.159091	0.47541		0.02	0.0877193	0	0.157895		0.352941	1	1	0.208696		0.0416667	0.292929		0.352941	0.0493827	0.203125		0.220339	0.0326087	0	0.0111111	0.0352941		1.14742	3.02942		0.146667	0.981818	0.774648
	0	0.0140845	0.148148	0	0.0535714	0.0384615	0		0	0.671642	0.322581	0.931624	1	0.918605		0.49	0.322222	0.390805	0.777778		0.0344828	0.0483871	0.133333	0		0.322581	1	0.981481	0.242188		0.0849057	0.183908		0.322581	0.025641	0.186667		0.47619	0.010101	0	0	0.361111		1.06756	2.88475		0.157407	1	0.913793
	0	0	0.0441176	0	0.0322581	0	0		0	0.626667	0.193548	0.86087	1	0.898734		0.626263	0.127273	0.227848	0.573034		0.0172414	0.121622	0.057971	0.0625		0.193548	1	1	0.263158		0.0481928	0.241758		0.193548	0.0449438	0.152778		0.235294	0	0.0106383	0.0128205	0.432836		0.939771	2.77098		0.281818	1	1
	0.0196078	0	0	0	0.031746	0.02	0		0.03125	0.80303	0.137931	1	0.962025	0.876543		0.646341	0.267442	0.254902	0.59596		0.0181818	0.0704225	0.0277778	0.129032		0.137931	1	1	0.398058		0.0322581	0.389381		0.137931	0.0508475	0.0649351		0.493671	0	0	0.0638298	0.362319		0.914188	2.68158		0.238095	0.921053	0.672414
	0	0	0.0204082	0.030303	0.0394737	0.0277778	0		0	0.883333	0.314815	0.839623	0.956044	0.876712		0.635294	0.337662	0.217391	0.571429		0	0.08	0.0963855	0.115385		0.314815	0.941176	1	0.247525		0	0.201681		0.314815	0.0701754	0.0958904		0.45122	0.0169492	0	0.0266667	0.307692		0.828354	2.67594		0.346154	0.870968	0.606557
	0	0	0.121951	0	0.0434783	0	0		0	0.558442	0.710526	0.923077	0.947368	0.931818		0.523256	0.256881	0.223684	0.422535		0.0392157	0.046875	0.155556	0.0416667		0.710526	1	0.975	0.13		0.039604	0.100775		0.710526	0	0.1		0.512821	0.0263158	0.0128205	0.0238095	0.3		0.798021	2.66804		0.223684	1	0.695122
	0.0681818	0	0.0338983	0	0.0508475	0.0196078	0.0181818		0	0.782609	0.313131	0.973451	1	0.881579		0.5875	0.309278	0.252525	0.4		0	0.0714286	0.142857	0.0888889		0.313131	0.918033	0.912621	0.2		0.0857143	0.256198		0.313131	0.0135135	0.139535		0.454545	0	0.000123457	0.0227273	0.253968		0.769771	2.20192		0.361446	0.930233	0.82
	0	0	0	0	0.031746	0.0175439	0.027027		0.000204082	0.694444	0.373626	0.806818	1	0.965909		0.530864	0.283951	0.517857	0.484848		0.000204082	0.0285714	0.0441176	0		0.373626	1	0.943548	0.306931		0	0.271605		0.373626	0	0.118644		0.517241	0	0.0135135	0.0104167	0.220779		0.711833	2.0129		0.206186	1	0.862745
	0.027027	0	0.0121951	0	0.105263	0	0		0	0.640449	0.280488	0.881818	0.962025	1		0.586667	0.269663	0.186813	0.338028		0.0416667	0.111111	0.0857143	0		0.280488	1	0.904412	0.296296		0.101266	0.202532		0.280488	0	0.0882353		0.544118	0	0	0	0.0487805		0.705583	1.84387		0.370787	0.94	0.642857
	0.025	0	0.0483871	0	0.0149254	0	0		0	0.8	0.320988	0.852174	1	0.91358		0.753247	0.215909	0.225806	0.444444		0	0.16	0.0307692	0.0612245		0.320988	1	0.877049	0.226087		0.020202	0.415842		0.320988	0.0322581	0.12		0.377358	0.0128205	0	0	0.0833333		0.658646	1.82104		0.0961538	0.928571	1
	0.0377358	0	0	0	0.0655738	0.0526316	0.0350877		0	0.772152	0.4	0.827869	0.88764	0.917526		0.730769	0.3	0.213483	0.488095		0	0.108108	0.0363636	0.0681818		0.4	0.966667	0.940678	0.173077		0.0438596	0.195122		0.4	0.0212766	0.149533		0.439394	0	0	0	0.130435		0.648979	1.78887		0.134021	0.857143	1
	0.0175439	0	0.0114943	0.0178571	0.0263158	0.0454545	0		0	0.759036	0.423423	0.904762	1	1		0.755102	0.223684	0.322034	0.522222		0.0227273	0.0547945	0.08	0.1		0.423423	0.929825	0.946903	0.192308		0.0347826	0.220339		0.423423	0	0.106667		0.443038	0	0	0.0243902	0		0.497229	1.77494		0.296296	1	0.943182
	0	0	0.0597015	0.0222222	0.0147059	0.0322581	0		0	0.633803	0.472441	0.764706	1	1		0.805825	0.6	0.209677	0.515152		0	0.0606061	0.0273973	0.0833333		0.472441	1	0.899083	0.32		0.0631579	0.326531		0.472441	0.04	0.129032		0.44898	0	0	0	0					0.358696	1	1
	0	0.0263158	0	0	0	0.03125	0.0357143		0	0.853333	0.423423	0.8125	0.918367	0.910714		0.754902	0.263736	0.215054	0.478873		0	0.0789474	0	0		0.423423	1	0.840708	0.279279		0	0.25		0.423423	0.0224719	0.132353		0.527273	0.0322581	0.0113636	0	0.0862069					0.166667	1	0.0823529
	0.027027	0	0.0246914	0	0	0.0333333	0		0	0.916667	0.67	0.737705	1	0.930556		0.808511	0.294118	0.25	0.628205		0.0227273	0.0655738	0.121212	0		0.67	1	1	0.235294		0.0454545	0.269231		0.67	0	0.0795455		0.492308	0	0.0405405	0.0243902	0.0120482					0.097561	0.934783	0.0425532
	0	0	0.0121951	0	0.046875	0.0175439	0		0	0.712871	0.472222	0.820755	1	1		0.490196	0.151899	0.215909	0.376812		0.0163934	0.0677966	0.05	0.047619		0.472222	1	0.973684	0.222222		0.0686275	0.185185		0.472222	0.047619	0.0869565		0.5	0	0.0133333	0.0352941	0.01					0.111111	0.903846	0.705128
	0	0.0243902	0.0606061	0	0.0327869	0	0		0	0.894118	0.5	0.894231	0.957447	1		0.557692	0.341772	0.177419	0.518987		0.0487805	0.0540541	0.0983607	0.0232558		0.5	1	1	0.184466		0.101124	0.457627		0.5	0.0422535	0.0793651		0.561404	0	0	0.03125	0					0.0744681	0.104167	0.712329
	0	0	0.0508475	0	0.0149254	0.0172414	0		0	0.721519	0.272727	0.923077	0.951613	1		0.736264	0.272727	0.313131	0.46988		0	0.0833333	0.0909091	0.057971		0.272727	1	0.921053	0.18018		0.0714286	0.246377		0.272727	0.0434783	0.112676		0.516667	0	0.025641	0	0.0104167					0.158537	0.866667	0.457447
	0.0243902	0.0188679	0	0.0208333	0.03125	0.030303	0		0	0.647727	0.42	0.855856	0.926829	1		0.871795	0.358974	0.232143	0.486111		0.0204082	0.134328	0.078125	0.04		0.42	1	1	0.234043		0	0.444444		0.42	0.0149254	0.0821918		0.173077	0	0	0.047619	0.0679612					0.204819	0.904762	0.605263
	0.027027	0	0	0	0.0147059	0	0		0	0.738095	0.458333	0.75	0.955882	0.966387		0.755556	0.212766	0.337079	0.292683		0.0204082	0.0862069	0.0555556	0.0625		0.458333	1	1	0.207921		0.0449438	0.113402		0.458333	0.0298507	0		0.206897	0	0.0217391	0.0449438	0.0576923					0.0471698	0.928571	0.522222
	0	0.0192308	0.0333333	0	0	0.0377358	0		0	0.660714	0.473684	0.892562	1	0.969388		0.628319	0.230769	0.302083	0.454545		0.0638298	0.0363636	0.145455	0.0192308		0.473684	1	1	0.27193		0.0483871	0.328947		0.473684	0.0322581	0.1		0.649123	0.0126582	0.015873	0.0294118	0.0434783					0.0813953	1	0.763158
	0	0.0277778	0	0	0.0175439	0	0		0	0.707692	0.445455	0.938596	1	1		0.828283	0.456311	0.235294	0.556962		0.0188679	0.111111	0.0731707	0.0724638		0.445455	1	0.964912	0.191011		0	0.138889		0.445455	0.0289855	0.0597015		0.433333	0.0238095	0	0.0294118	0.00884956					0.0394737	0.846154	0.569892
	0	0.0181818	0.0454545	0.0212766	0.0298507	0	0		0	0.666667	0.481818	0.919355	1	0.958763		0.76699	0.444444	0.209091	0.52439		0.02	0.0408163	0.111111	0.04		0.481818	1	1	0.186047		0	0.194805		0.481818	0.0128205	0.111111		0.366667	0.0138889	0	0	0.0408163					0.0379747	1	0.118644
	0.0294118	0	0.0135135	0.0208333	0.0128205	0.0363636	0		0.0169492	0.759259	0.40404	0.982906	1	0.898305		0.775281	0.164948	0.204301	0.322034		0	0.0217391	0.135135	0.0757576		0.40404	1	1	0.188811		0.0224719	0.151515		0.40404	0.04	0.0909091		0.445946	0	0	0.025	0.0222222					0.285714	1	0.180328
	0.0212766	0.030303	0	0	0	0.0816327	0		0	0.69697	0.531915	0.827957	1	1		0.776699	0.231707	0.288889	0.449275		0.015625	0.0178571	0.0882353	0.0294118		0.531915	1	1	0.275229		0	0.385965		0.531915	0.0379747	0.138462		0.387097	0	0.0131579	0.0125	0.0204082					0.217949	1	0.457831
	0	0	0.0625	0.0454545	0	0.016129	0		0	0.75	0.589474	0.700935	1	0.96875		0.816092	0.135802	0.434211	0.481481		0	0.0833333	0.194444	0.0384615		0.589474	1	0.918919	0.195402		0.0480769	0.151515		0.589474	0	0.0980392		0.47541	0	0	0	0.0506329					0.148649	1	0.8875
	0	0	0.0394737	0	0.0677966	0.125	0		0	0.890411	0.451923	0.761905	1	0.940594		0.626506	0.472222	0.295775	0.25		0.0192308	0.0689655	0.111111	0.0714286		0.451923	1	0.933962	0.212963		0	0.207921		0.451923	0	0.0806452		0.415385	0	0	0	0.117647					0.184783	1	0.932203
mean	0.0131156	0.00799674	0.036726	0.00761745	0.0281324	0.02465	0.00489486	mean	0.00204634	0.752094	0.419838	0.86886	0.971408	0.94683	mean	0.700345	0.288709	0.291629	0.479582	mean	0.0173205	0.0750389	0.079152	0.0537069	mean	0.419838	0.988455	0.959515	0.224315	mean	0.0410237	0.246852	mean	0.419838	0.0254488	0.114198	mean	0.442975	0.0073457	0.00595815	0.0165938	0.107929				mean	0.189142	0.897609	0.68745
[truncated: 65 more columns]
